# Inositol hexakisphosphate blocks tumor cell growth by activating apoptotic machinery as well as by inhibiting the Akt/NFκB-mediated cell survival pathway

Sandra Ferry<sup>1</sup>, Miho Matsuda<sup>1</sup>, Hiroki Yoshida<sup>2</sup> and Masato Hirata<sup>1,3</sup>

<sup>1</sup>Laboratory of Molecular and Cellular Biochemistry, Faculty of Dental Science and Station for Collaborative Research, Kyushu University, Fukuoka 812-8582, Japan and <sup>2</sup>Department of Immunology, Medical Institute of Bioregulation, Kyushu University, Fukuoka 812-8582, Japan

<sup>3</sup>To whom correspondence should be addressed  
Email: hirata1@dent.kyushu-u.ac.jp

It has been reported that inositol hexakisphosphate (InsP<sub>6</sub>, phytic acid), a natural product, has an anticancer role. However, there is inadequate information regarding the mechanism by which InsP<sub>6</sub> exerts anticancer actions, and the effect requires relatively high concentration of the agent, both of which hinders the usage of InsP<sub>6</sub> as an anticancer drug. In the present study, we investigated the mechanism by which InsP<sub>6</sub> acts as an anticancer agent, and tried to reduce the concentration of effective InsP<sub>6</sub>. Treatment of HeLa cells with InsP<sub>6</sub> at 1 mM induced apoptosis, as assessed by counting the cell number, and by Hoechst and TUNEL staining. This is probably mediated by intracellular InsP<sub>6</sub> itself and/or the dephosphorylated forms of metabolized InsP<sub>6</sub>, because incubation of HeLa cells with [<sup>3</sup>H]InsP<sub>6</sub> produces dephosphorylated forms such as InsP<sub>4</sub> and InsP<sub>5</sub>. Induction of apoptosis by InsP<sub>6</sub> was examined in two ways: inhibition of cell survival signaling and direct induction of apoptosis. Treatment of HeLa cells with tumor necrosis factor (TNF) or insulin stimulated the Akt-nuclear factor κB (NFκB) pathway, a cell survival signal, which involves the phosphorylation of Akt and IκB, nuclear translocation of NFκB and NFκB-luciferase transcription activity. InsP<sub>6</sub> blocked all these cellular events, but phosphatidylinositol 3-kinase activity was not affected. As well as inhibiting the Akt-NFκB pathway, InsP<sub>6</sub> itself caused mitochondrial permeabilization, followed by cytochrome c release, which later caused activation of the apoptotic machinery, caspase 9, caspase 3 and poly (ADP-ribose) polymerase. When InsP<sub>6</sub> was applied together with histone, the effective concentration to induce apoptosis was ~10-fold lower. These results revealed that extracellularly applied InsP<sub>6</sub> directly activates the apoptotic machinery as well as inhibits the cell survival signaling, probably by the intracellular delivery followed by a dephosphorylation.

## Introduction

Inositol hexakisphosphate (InsP<sub>6</sub>) is present in plants, particularly in cereals and legumes, at concentrations ranging from 0.4 to 6.4%. In plants, InsP<sub>6</sub> exists as a salt with monovalent and

**Abbreviations:** Δψ<sub>m</sub>, change in mitochondrial membrane potential; IκB, inhibitor of NFκB; NFκB, nuclear factor κB; PARP, poly (ADP-ribose) polymerase; PH domain, pleckstrin homology domain; PI3K, phosphatidylinositol 3-kinase; PtdInsP<sub>x</sub> and InsP<sub>x</sub>, phosphatidylinositol phosphate and inositol phosphate, respectively (position of phosphates is indicated in the parentheses and 'x' indicates the number of phosphates); TNF, tumor necrosis factor.

divalent cations such as Ca<sup>2+</sup>, Mg<sup>2+</sup> and K<sup>+</sup> (1,2). Inositol, InsP<sub>6</sub> and lower inositol phosphates (InsP<sub>1–5</sub>) are all present as intracellular molecules in mammalian cells as well (1,2). InsP<sub>5</sub> and InsP<sub>6</sub> are present in virtually all mammalian cells at substantial amounts, between 10 and 100 μM, much higher than any other InsPs (1,2). There are several reports that extracellularly applied InsP<sub>6</sub> exhibits an anticancer effect on several cancers in the blood, colon, liver, lung, mammary and prostate (3–8). Comparison of synthetic compounds and natural products, such as InsP<sub>6</sub>, suggests that the latter may be more suitable for chemoprevention of carcinogenesis, because their actions are milder (9). It has also been reported that InsP<sub>6</sub> is involved in cell apoptosis and differentiation (10). As to the mechanisms by which InsP<sub>6</sub> exerts anticancer effects, there have been several reports that InsP<sub>6</sub> inhibits the transforming growth factor α-stimulated-phosphatidylinositol 3-kinase (PI3K)-Akt pathway in prostate carcinoma cells; InsP<sub>6</sub> inhibited PI3K activity, followed by the activation of Akt which is involved in cell survival through the phosphorylation of Bad, a pro-apoptotic molecule, of caspase 9 and/or of IκB kinaseα (IKKα) (11). However, another report is conflicting; InsP<sub>6</sub> had no effect on PI3K activation, but was effective in the inhibition of nuclear factor κB (NFκB) activation (12). Since the Akt-NFκB pathway is known to be a strong cell survival pathway (13,14), it is important to determine which step is impaired by InsP<sub>6</sub>.

The dephosphorylation of InsP<sub>6</sub> to InsP<sub>1–5</sub> could enhance its anticancer function (15). Razzini *et al.* (16) reported that Ins(1,3,4,5,6)P<sub>5</sub> and Ins(1,4,5,6)P<sub>4</sub>, at relatively low concentrations, exhibited anticancer activity in human breast cancer and human ovarian cancer cells to the same extent as InsP<sub>6</sub> at millimolar concentrations. This effect is a consequence of the competition between InsPs and PtdIns(3,4,5)P<sub>3</sub> for proteins bearing the pleckstrin homology (PH) domain favoring PtdIns(3,4,5)P<sub>3</sub>, a product of PI3K activity such as that of Akt.

In the present study, we investigated the mechanism of InsP<sub>6</sub> internalization and its competence to inhibit cell proliferation and to induce apoptosis. We also looked into the mechanisms by which InsP<sub>6</sub> inhibits the tumor necrosis factor (TNF)-induced PI3K-NFκB survival pathway on which we reported previously (14) and whether InsP<sub>6</sub> itself causes activation of the apoptotic pathway. Furthermore, we examined the effects of histone to reduce the effective concentration of InsP<sub>6</sub>.

## Materials and methods

### Cell culture and growth assays

HeLa cells were cultured in Dulbecco's modified Eagle medium containing 10% fetal bovine serum and were treated with InsP<sub>6</sub> (Sigma, St Louis, MO) at various concentrations. The number of viable and dead cells was counted on the first, second, third and fourth day after InsP<sub>6</sub> treatment. Cells were stained with trypan blue to distinguish the viable and dead cells.

### Soft agar colony formation assay

This assay was performed using 6 well plates. The bottom layer contained 2 ml of 0.5% agar in medium. The middle layer contained 1 ml of 0.38% agar in medium with 10<sup>3</sup> HeLa cells. The top layer contained 1 ml of 0.38% agar in medium with various concentrations of InsP<sub>6</sub>. Cultures were incubated at 37°C in a humidified atmosphere of 5% CO<sub>2</sub>.

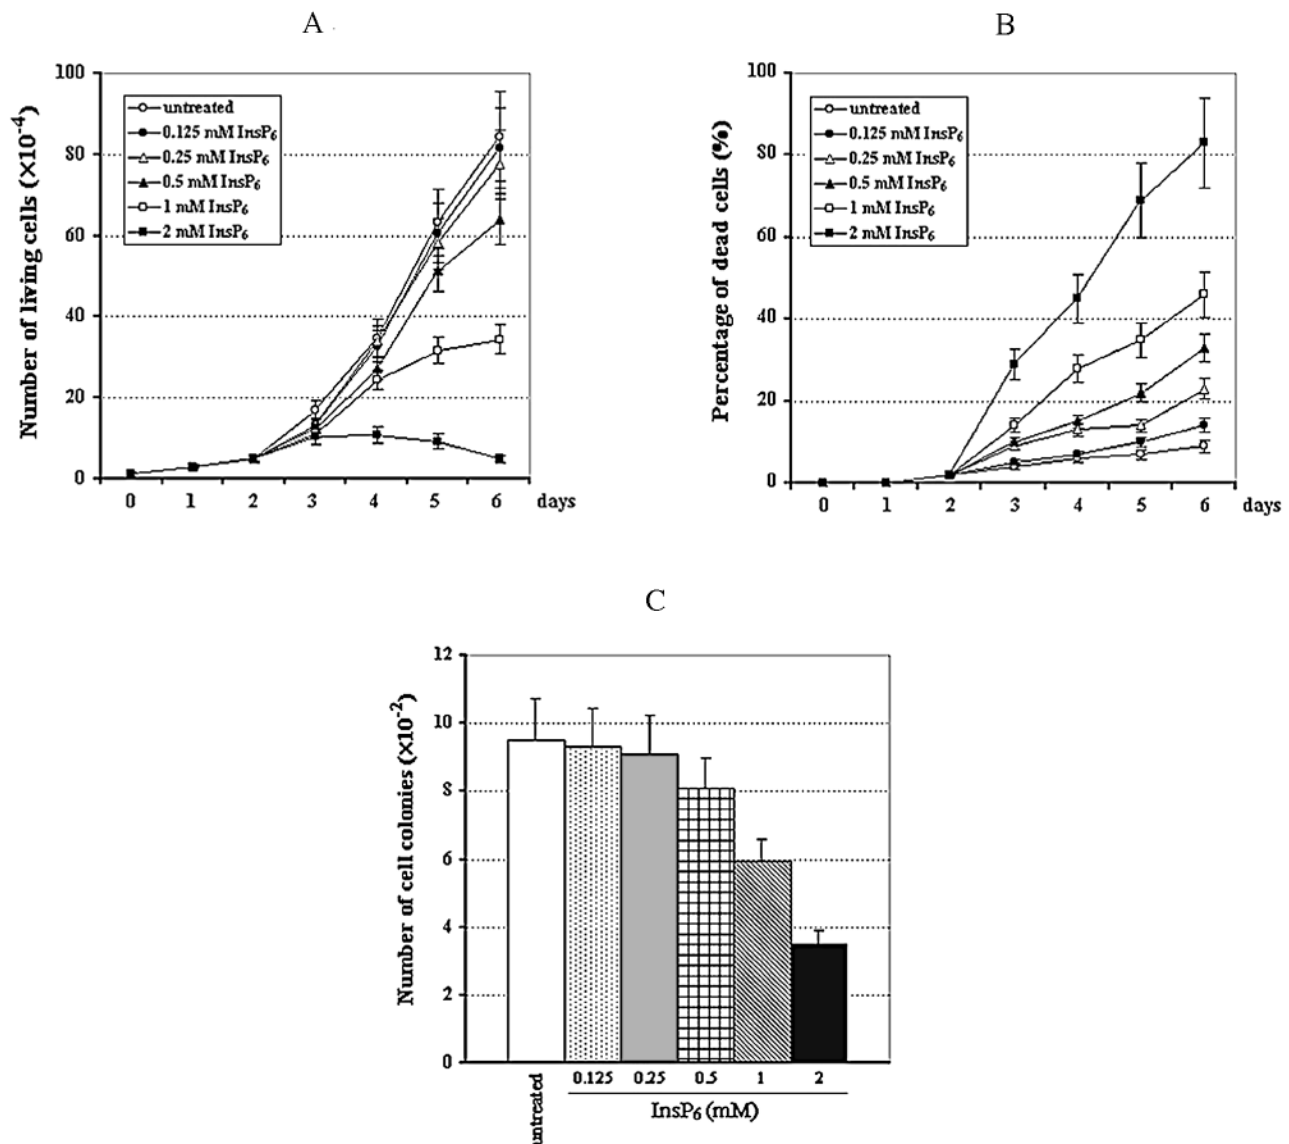

**Fig. 1.** Growth inhibition and apoptosis induction by InsP<sub>6</sub>. HeLa cells ( $2 \times 10^4$ ) were starved for 12 h and treated with InsP<sub>6</sub> at various concentrations for 2 h. Dulbecco's modified Eagle medium containing 10% fetal bovine serum and InsP<sub>6</sub> at various concentrations was then added. Pre-incubation with InsP<sub>6</sub> in the absence of serum for 2 h is to facilitate the entry into cells, preventing the complex formation with serum protein. The number of living cells (A) and the percentage of dead cells (B) were counted on the first, second, third and fourth day after InsP<sub>6</sub> treatment. Soft agar colony formation assay was performed as described in the Materials and methods. The number of  $\geq 15$ -cell-colonies was counted under a microscope at  $\times 100$  magnification (C). Each panel shows the mean  $\pm$  SEM of five independent determinations.

#### Hoechst and TUNEL staining

This experiment was performed according to a method described by Negri *et al.* (17). Briefly, HeLa cells were seeded onto coverslips, stimulated, rinsed in PBS, fixed with ice-cold 10% trichloroacetic acid, and washed in cold 70, 80, 90% and absolute ethanol. DNA apoptotic fragments were end-labeled using the Apoptosis Detection System, Fluorescein (Promega, Madison, WI). After washing, the TUNEL-processed samples were incubated with Hoechst 33258 (Sigma).

#### Flow cytometry

Flow cytometry detection of apoptotic cells was performed as described by Yoshida *et al.* (18). Briefly, pretreated HeLa cells were harvested and suspended in 1 ml of hypotonic fluorochrome solution (50  $\mu\text{g}/\text{ml}$  propidium iodide in 0.1% sodium citrate containing 0.1% Triton X-100). Cell suspensions were placed at 4°C in the dark overnight before flow cytometric analysis. The propidium iodide fluorescence of individual nuclei was measured using an EPICS XL flow cytometer.

#### Immunoblotting

Stimulated cells were incubated with lysis buffer [20 mM HEPES buffer pH 7.2, 150 mM NaCl, 2 mM EDTA, 1% Triton X-100, 50 mM sodium fluoride,

40 mM sodium  $\beta$ -glycerophosphate, 2 mM sodium orthovanadate, 30 mM sodium pyrophosphate and a cocktail of protease inhibitors (see below)] and scraped. Samples were separated by SDS-PAGE and transferred to a polyvinylidene difluoride sheet. After blocking with 5% skimmed milk in Tris-buffered saline (150 mM NaCl and 20 mM Tris-HCl, pH 7.2), the sheets were incubated with the first antibody. The secondary antibody was horseradish peroxidase-conjugated donkey anti-rabbit or anti-mouse IgG antibody (Amersham, Buckinghamshire, UK). The bound antibodies were visualized using the ECL system (Amersham). The cocktail of protease inhibitors contained 10  $\mu\text{M}$  aprotinin, 10  $\mu\text{M}$  pepstatin A, 10  $\mu\text{M}$  leupeptin and 1 mM *p*-amidinophenyl methanesulfonyl fluoride (PMSF).

#### Nuclear extract

After washing with PBS, the cells were incubated in 400  $\mu\text{l}$  buffer A (10 mM HEPES buffer pH 7.9, 10 mM KCl, 0.1 mM EDTA, 0.1 mM EGTA, 1 mM dithiothreitol and the cocktail of protease inhibitors) on ice for 15 min. Nonidet P-40 at 10% (25  $\mu\text{l}$ ) was then added and the cells vortexed for 10 s. After centrifugation for 1 min at 12 000 r.p.m., the resulting pellet was collected, suspended in 50  $\mu\text{l}$  of buffer B (20 mM HEPES buffer pH 7.9, 0.4 M NaCl, 1 mM EDTA, 1 mM EGTA, 1 mM dithiothreitol and the cocktail of protease inhibitors) and incubated on ice for 15 min with occasional vortex

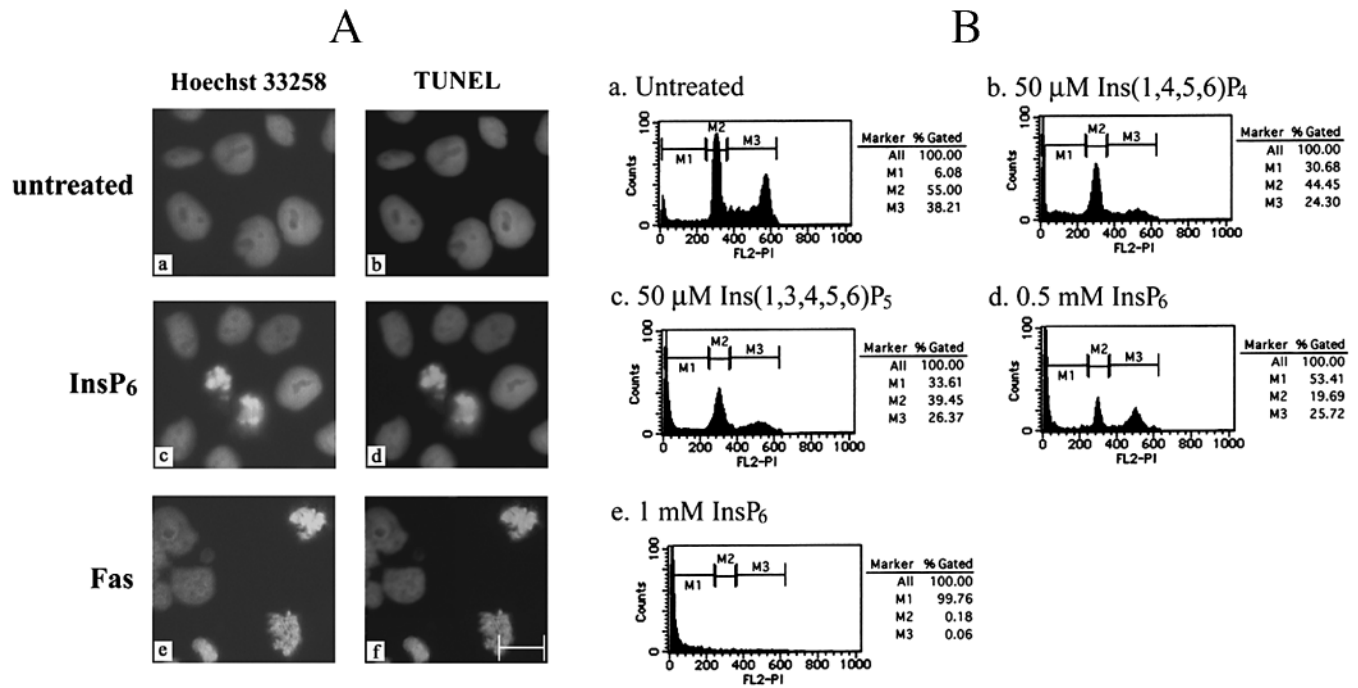

**Fig. 2.** (A) Hoechst and TUNEL staining. HeLa cells ( $1 \times 10^6$ ) were seeded on coverslips, starved for 12 h and treated with 1 mM  $\text{InsP}_6$  (c and d) or 5  $\mu\text{g}/\text{ml}$  Fas (e and f) for 6 h. Hoechst and TUNEL staining were carried out as described in the Materials and methods. The experiment was repeated three times. (B) Flow cytometry detection of apoptotic cells. HeLa cells ( $1 \times 10^6$ ) were starved for 12 h and then stimulated with 50  $\mu\text{M}$   $\text{Ins}(1,4,5,6)\text{P}_4$  (Cell Signals, Lexington, KY) (b), or 50  $\mu\text{M}$   $\text{Ins}(1,3,4,5,6)\text{P}_5$  (Cell Signals) (c), 0.5 mM or 1 mM  $\text{InsP}_6$  (d and e) for 48 h. The procedures were described in the Materials and methods. This experiment was repeated five times.

mixing. After a final centrifugation of the sample for 10 min at 12 000 r.p.m., the supernatant was taken as the nuclear extract.

#### Luciferase assay

HeLa cells were transfected with NF $\kappa$ B-luc (Clontech, Palo Alto, CA). Luciferase assay was performed using the luciferase assay system (Promega). Briefly, after washing with PBS, 400  $\mu\text{l}$  of lysis buffer was added to the cells, followed by a single freeze–thaw to ensure complete lysis. The culture dish was rocked several times, scraped and the contents transferred to a microcentrifuge tube. The tube was vortexed for 15 s and centrifuged at 12 000  $g$  for 2 min. The resulting supernatant was collected and added to a luminometer tube containing luciferase assay reagent. The tube was then read for 10 s to measure luciferase activity.

#### PI3K assay

Stimulated HeLa cells were lysed in a buffer (20 mM Tris–HCl buffer pH 8.0, 137 mM NaCl, 1 mM  $\text{MgCl}_2$ , 10% Nonidet P-40, 1 mM dithiothreitol, 0.4 mM sodium orthovanadate and 1 mM PMSF). The cell lysate supernatant was collected by centrifugation and incubated with monoclonal anti-PI3K (p85 $\alpha$ ) antibody immobilized with protein G–Sepharose. The beads were washed with PBS containing 1% Nonidet P-40 and 1 mM dithiothreitol, with a solution consisting of 0.1 M Tris–HCl buffer (pH 7.6), 0.5 M LiCl and 1 mM dithiothreitol, and finally with a solution containing 10 mM Tris–HCl buffer (pH 7.6), 0.1 M NaCl and 1 mM dithiothreitol. This was followed by incubation with 0.5 mg/ml phosphoinositide fraction containing  $\text{PtdIns}(4,5)\text{P}_2$ . Reaction buffer (50 mM  $\text{MgCl}_2$ , 100 mM HEPES buffer pH 7.6, 250  $\mu\text{M}$  ATP containing 5  $\mu\text{Ci}$  of [ $\gamma$ - $^{32}\text{P}$ ]ATP) was added and incubated at 30°C for 10 min. The assay was continued as described by Chen *et al.* (12).

#### $\text{PtdIns}(3,4,5)\text{P}_3$ production assay

[ $^{32}\text{P}$ ]Orthophosphate-labeled HeLa cells were pre-treated with buffer A (30 mM HEPES buffer pH 7.4, 110 mM NaCl, 1 mM  $\text{MgCl}_2$  and 10 mM glucose) containing 25  $\mu\text{M}$  LY294002 or 1 mM  $\text{InsP}_6$  for 2 h at 37°C, and incubated in buffer A containing 100 ng/ml TNF or insulin for 5 min. This assay was continued as described by Hidaka *et al.* (19).

#### Immunofluorescence

The stimulated HeLa cells were fixed using a solution of 4% paraformaldehyde in PBS. After washing in PBS, the fixed HeLa cells were treated with 100 mM glycine and 0.2% Triton X-100 in PBS. Samples were incubated in 0.1% bovine serum albumin in PBS to block non-specific binding. Polyclonal anti-Akt antibody (New England BioLabs, Beverly, MA) was applied as the

first antibody, followed by FITC-conjugated goat F(ab') $_2$  anti-rabbit IgG (Biosource, Camarillo, CA) as the second antibody.

#### $\Delta\psi_m$ analysis

$\Delta\psi_m$  analysis was carried out as described by Yoshida *et al.* (20). Briefly, the cell pellet was suspended in 250  $\mu\text{l}$  of 20 nM DiOC6(3) in PBS and incubated in an incubator for 15 min.  $\Delta\psi_m$  was measured using an EPICS XL flow cytometer.

#### Mitochondrial fraction

This assay was carried out according to the MBL cytochrome c kit protocol. Briefly, cells were homogenized in 200  $\mu\text{l}$  of ice-cold solution containing 10 mM Tris–HCl (pH 7.5), 0.3 M sucrose, and the cocktail of protease inhibitors, followed by centrifugation at 100 000  $g$  at 4°C for 60 min. The supernatant was collected as the cytosol fraction. The precipitate was resuspended in 200  $\mu\text{l}$  ice-cold solution containing 10 mM Tris–HCl (pH 7.5), 1% Triton X-100, 150 mM NaCl and protease inhibitor mixture, sonicated with an ultra sonicator, and centrifuged at 10 000  $g$ , 4°C for 30 min. The supernatant was collected as the mitochondrial fraction.

#### $\text{InsP}_6$ internalization

Pretreated cells were labeled with 0.5  $\mu\text{Ci}$  of [ $^3\text{H}$ ] $\text{InsP}_6$  for 6 h. After washing with PBS, they were incubated with 0.8 ml of 2 M perchloric acid containing 1 mg/ml  $\text{InsP}_6$  for 15 min on ice. Then 0.4 ml of 1 M potassium carbonate and 5 mM EDTA was added and a freeze–thaw cycle was carried out twice. The mixture was kept at 4°C for 2 h, then centrifuged at 15 000 r.p.m. for 15 min. The resulting supernatant was applied to a strong anion exchange column (Whatman, Kent, UK), mounted on a high performance liquid chromatography system at a flow rate of 1 ml/min. Fractions were collected at 1.1 min intervals, followed by liquid scintillation counting after mixing with 4 ml of ultima-flo (Packard, Grönigen, The Netherlands).

## Results

### $\text{InsP}_6$ inhibited the growth and induced apoptosis of HeLa cells

HeLa cells were cultured at an initial density of  $2 \times 10^4$  cells in each well of a 6 well culture dish for 2 days. Various concentrations of  $\text{InsP}_6$  were added to the well, followed by further cultivation for up to 4 days (6 days after the initiation of culture). The growth of HeLa cells was inhibited by  $\text{InsP}_6$ ,

and cell death was induced as well (Figure 1A and B). The increase in dead cells was evident at concentrations as minimal as 0.25 mM InsP<sub>6</sub>, and increased concentrations increased the effect concomitantly. The inhibition of the proliferation of HeLa cells by InsP<sub>6</sub> was also seen in an anchorage-free colony

formation assay in soft agar (Figure 1C). Such an effect was not observed with inositol hexakisulfate (data not shown), indicating the specific effect of InsP<sub>6</sub>.

Cell death caused by InsP<sub>6</sub> appeared to be apoptosis, since Hoechst 33258 staining of cells treated with InsP<sub>6</sub> showed

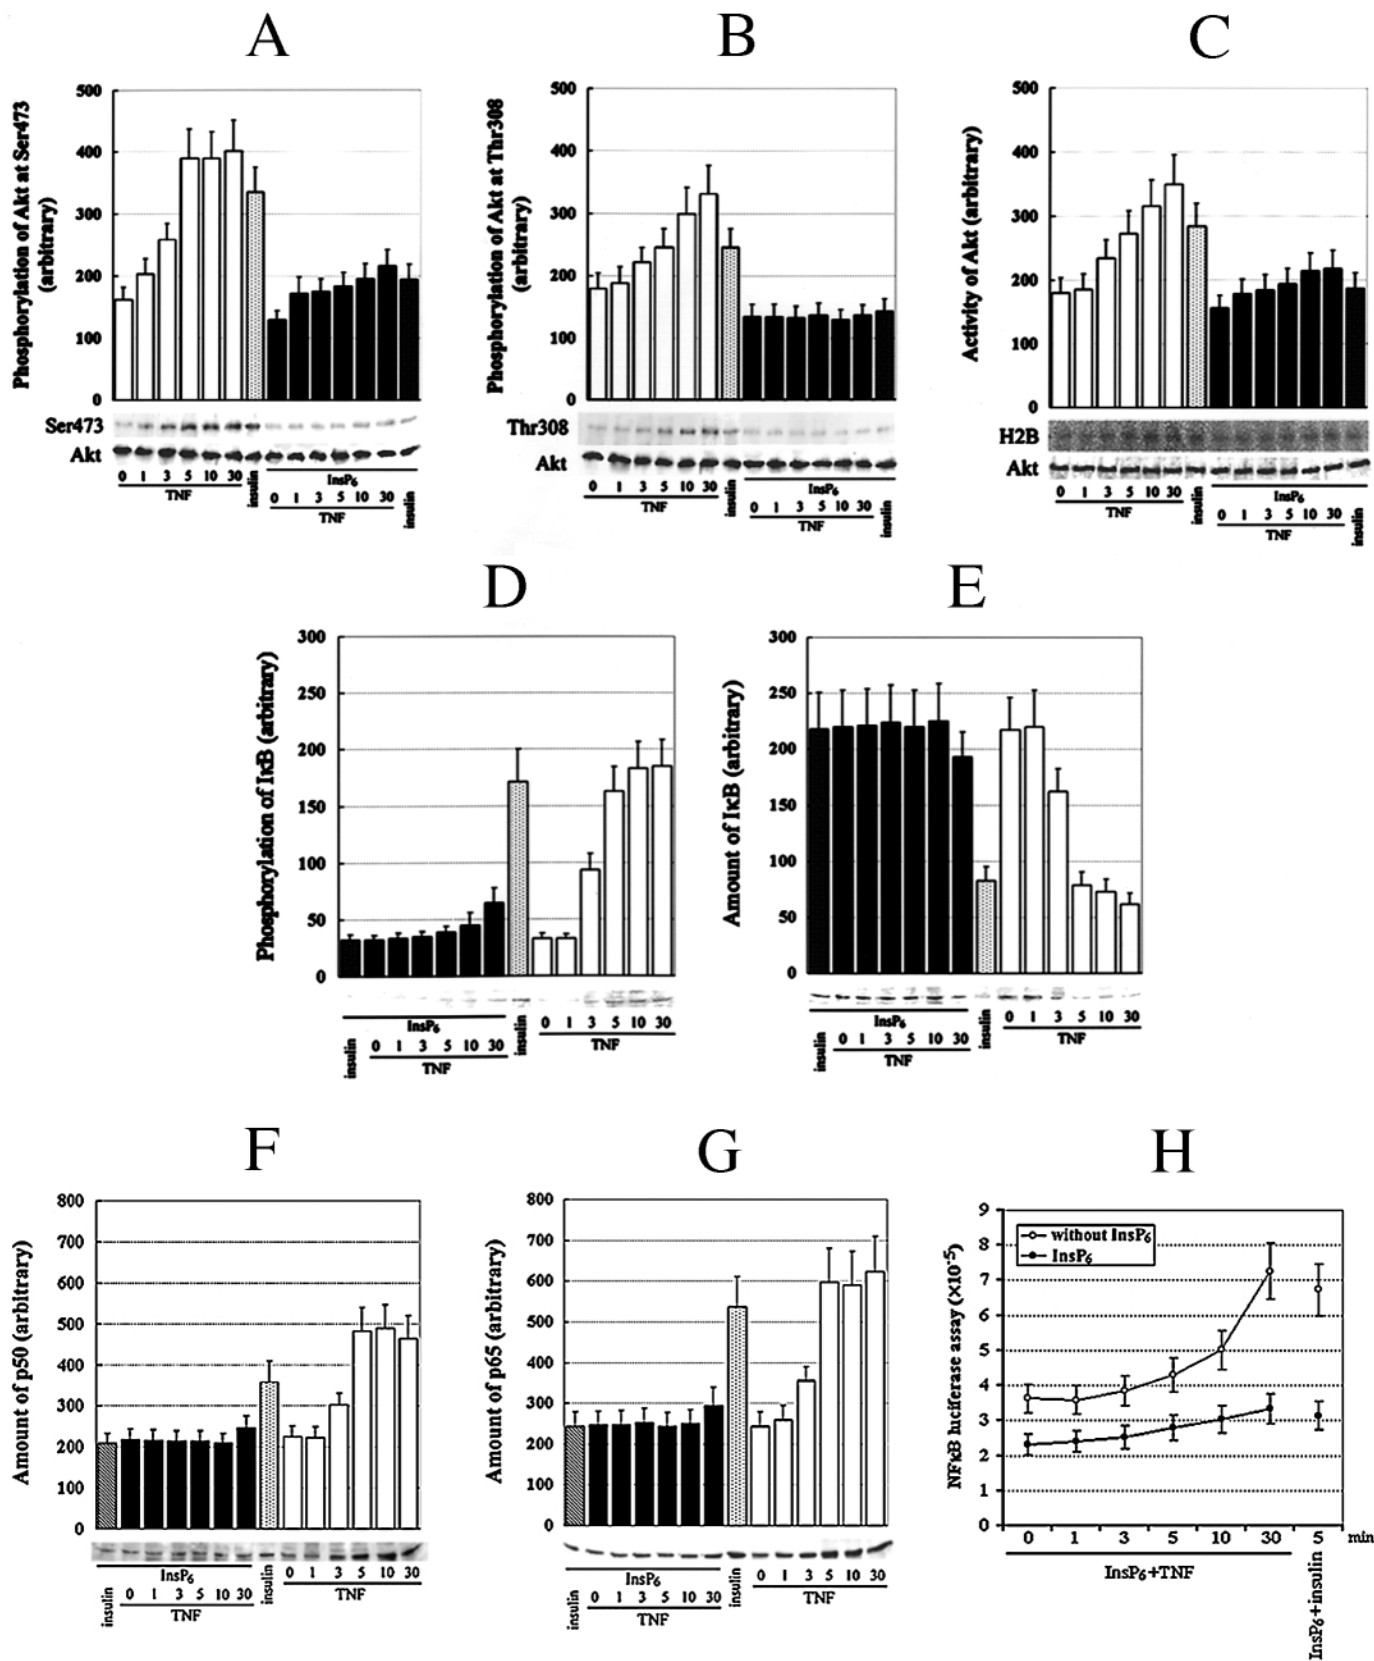

nuclear fragmentation in a manner similar to cells treated with Fas, which was used as a positive control. Also, the cells stained with TUNEL (Figure 2A). Furthermore, flow cytometric analysis of cells (both dish-attached and floating cells) stained with propidium iodide confirmed the presence of nuclear fragmentation in cells treated with InsP<sub>6</sub>, as shown in Figure 2B. This also showed that lower concentrations of InsP<sub>4</sub> and InsP<sub>5</sub> were effective at causing apoptosis. Chelation of divalent cations such as Ca<sup>2+</sup> and Mg<sup>2+</sup> by millimolar concentrations of InsP<sub>6</sub> was not a cause of apoptosis, because supplementing with Ca<sup>2+</sup> and Mg<sup>2+</sup> did not change the results (data not shown). Furthermore, addition of EDTA at millimolar concentrations for up to 4 days to chelate the cations did not induce cell death (data not shown).

#### *InsP<sub>6</sub> inhibited cell survival signaling through the Akt–NFκB pathway*

Apoptosis can be the result of either or both of inhibition of the cell survival signal and the direct induction of apoptosis. Thus, we first examined whether InsP<sub>6</sub> inhibits cell survival signaling. For this purpose, we examined whether InsP<sub>6</sub> inhibits the TNF–PI3K–Akt–NFκB pathway, which has been shown to stimulate cell survival in SAS cells by us (14) and in 293 and HeLa cells by Ozes *et al.* (13).

Phosphorylation of Akt at both Ser473 and Thr308 was seen within 1 min of stimulation with TNF at 100 ng/ml, and reached maximal levels within 10 min. Stimulation with insulin at 100 ng/ml for 5 min provided similar results (Figure 3A and B). Pre-incubation with 1 mM InsP<sub>6</sub> prevented the Akt phosphorylation at both sites (Figure 3A and B). *In vitro* Akt activity was assayed using the phosphorylation of histone 2B (H2B) as the substrate. The results were apparently parallel to those of the phosphorylation of Akt; almost maximal Akt activity was seen at 10 min, and pre-incubation with 1 mM InsP<sub>6</sub> abolished the Akt activity (Figure 3C).

It has been reported that Akt activated by phosphorylation can then induce the phosphorylation of IKKs, mainly IKKβ, which later induces the phosphorylation and degradation of IκB (21). Considering that Akt is upstream of this pathway, we needed to check whether this pathway was also inhibited. Stimulation with 100 ng/ml TNF showed IκB phosphorylation in 3 min, which reached maximal levels in 10 min, whilst IκB degradation was seen in 3 min (Figure 3D and E). Similar results were seen in cells stimulated with 100 ng/ml insulin. IκB phosphorylation and degradation by 100 ng/ml TNF or insulin was abolished by pre-incubation with 1 mM InsP<sub>6</sub> (Figure 3D and E).

Following IκB phosphorylation and degradation, NFκB is free to translocate to the nucleus (21,22). We also noticed this phenomenon in the present results, in that the amount of NFκB (p65 and p50) was increased in the nucleus after 100 ng/ml TNF stimulation. This translocation was totally inhibited in

the cells pre-incubated with 1 mM InsP<sub>6</sub> (Figure 3F and G). Results from the NFκB-luciferase transfected HeLa cells also agreed with this result (Figure 3H). Treatment with TNF increased the NFκB transcriptional activity gradually, but the 1 mM InsP<sub>6</sub>-pre-incubated sample showed only a slight rise in NFκB activity. InsP<sub>6</sub> also had the same capacity of inhibiting insulin-induced NFκB nuclear translocation and activity (Figure 3H).

Cell survival is also promoted by activation of the mitogen-activated protein kinase (MAPK) pathway (23,24). InsP<sub>6</sub> had little effect on this pathway as assessed by the phosphorylation of MAPK (data not shown), indicating that the inhibition by InsP<sub>6</sub> is specific to the Akt cell survival pathway.

#### *InsP<sub>6</sub> did not affect the activity of PI3K and PtdIns(3,4,5)P<sub>3</sub> production*

An investigation as to whether InsP<sub>6</sub> affects the activity of PI3K, responsible for producing PtdIns(3,4,5)P<sub>3</sub>, was performed. Tyrosine phosphorylation of p85, a regulatory subunit of type 1 PI3K, was increased by stimulation with 100 ng/ml TNF or insulin. Pre-incubation with 25 μM LY294002, a PI3K inhibitor, inhibited the phosphorylation of p85, but pre-incubation with InsP<sub>6</sub> was ineffective (Figure 4A). The ability of PI3K to convert PtdIns(4,5)P<sub>2</sub> to PtdIns(3,4,5)P<sub>3</sub> was enhanced by immunoprecipitates of the anti-p85 subunit prepared from cells stimulated with TNF or insulin. Pre-incubation with 25 μM LY294002 diminished this effect, but pre-incubation with 1 mM InsP<sub>6</sub> did not cause any reduction in the activity (Figure 4B). [<sup>32</sup>P]Orthophosphate-labeled HeLa cells also showed the same result; PtdIns(3,4,5)P<sub>3</sub> production was upregulated by stimulation with 100 ng/ml of TNF or insulin. Pre-incubation with 25 μM LY294002 decreased this production but pre-incubation with 1 mM InsP<sub>6</sub> had no effect (Figure 4C).

#### *InsP<sub>6</sub> caused the inhibition of Akt membrane translocation*

When PtdIns(3,4,5)P<sub>3</sub> is produced in the cell membrane, Akt, present mainly in the cytosol, moves to the cell membrane by binding to PtdIns(3,4,5)P<sub>3</sub> via its PH domain. This translocation was seen after stimulation with 100 ng/ml TNF or insulin, and was prevented by pre-incubation with 25 μM LY294002, a potent PI3K inhibitor. Interestingly, the same results were obtained in HeLa cells pre-incubated with 1 mM InsP<sub>6</sub> (Figure 5), in spite of little inhibition of PtdIns(3,4,5)P<sub>3</sub> production.

#### *Direct effects of InsP<sub>6</sub> on events relating to cell apoptosis*

We then examined whether InsP<sub>6</sub> directly activates events relating to apoptosis. We first analyzed Δψ<sub>m</sub> in cells treated with InsP<sub>6</sub>. We found that 0.5 mM InsP<sub>6</sub> lowered Δψ<sub>m</sub> by ~50%. A more dramatic change was seen when 1 mM InsP<sub>6</sub> was used (Figure 6A). Cytochrome c release was observed after 6 h treatment with 0.5 mM InsP<sub>6</sub> and 12 h treatment caused more cytochrome c release. More cytochrome c release

**Fig. 3.** Phosphorylation and activity of Akt. HeLa cells (1×10<sup>6</sup>) were starved for 12 h and treated with or without 1 mM InsP<sub>6</sub> for 2 h, followed by 100 ng/ml TNF stimulation for 1, 3, 5, 10, 30 min or 100 ng/ml insulin for 5 min. Cell lysates were immunoprecipitated by polyclonal anti-Akt antibody (New England BioLabs), coupled to protein G–Sepharose (Amersham) for detecting Akt phosphorylation (A and B). The precipitates were analyzed by immunoblotting using polyclonal anti-phospho-Akt (Ser473) (New England BioLabs) (A) or polyclonal anti-phospho-Akt (Thr308) (New England BioLabs) (B). (C) The immunoprecipitates were assayed for kinase activity using H2B and [<sup>32</sup>P]ATP as substrates (14). The membranes were reprobed for Akt using polyclonal anti-Akt (New England BioLabs). To detect the phosphorylation and degradation of IκB, cell lysates were analyzed by immunoblotting using polyclonal anti-phospho-specific-IκB (New England BioLabs) (D) or polyclonal anti-IκB (Santa Cruz Biotechnology, Santa Cruz, CA) (E). To detect NFκB nuclear translocation, nuclear extracts, prepared as described in the Materials and methods, were analyzed by immunoblotting using polyclonal anti-NFκB p50 (Santa Cruz Biotechnology) (F) or polyclonal anti-NFκB p65 (Santa Cruz Biotechnology) (G). To detect NFκB nuclear translocation and NFκB-luciferase activity, luciferase assay was performed as described in the Materials and methods (H). Each panel shows the typical results and the mean ± SEM of five independent determinations.

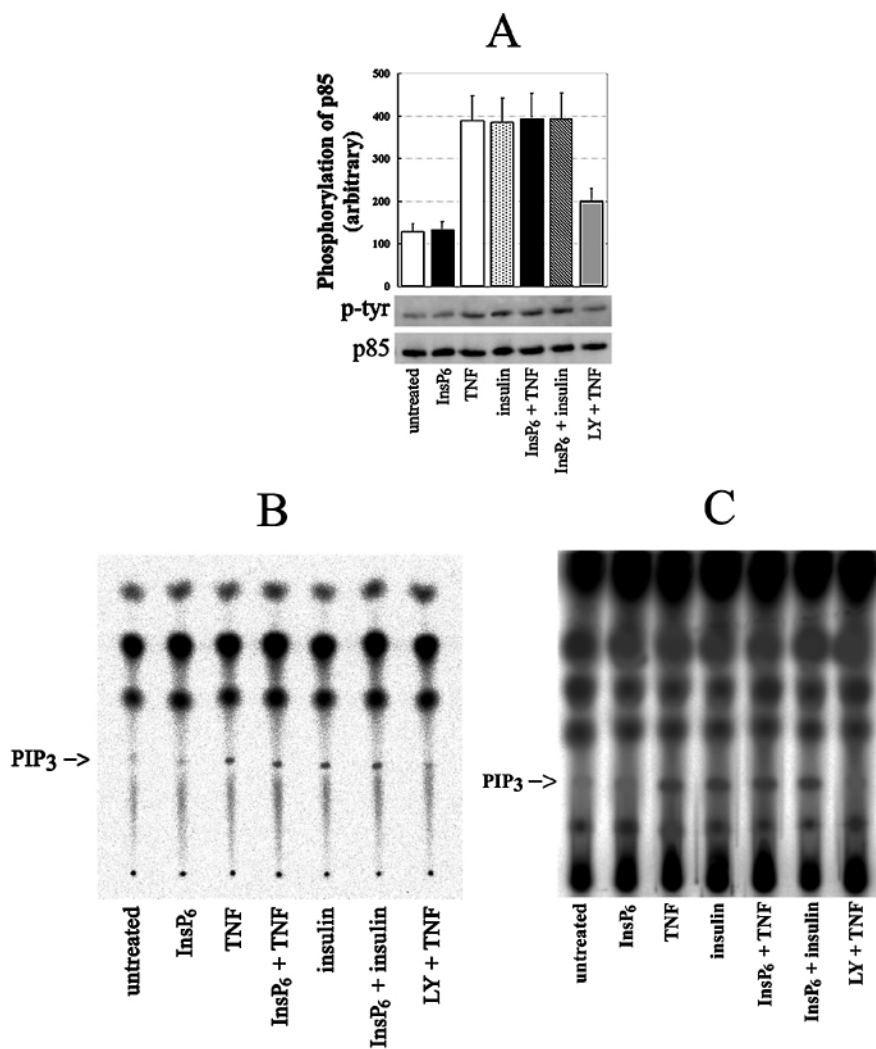

**Fig. 4.** Phosphorylation and activity of PI3K and PtdIns(3,4,5)P<sub>3</sub> production. HeLa cells ( $1 \times 10^6$ ) were starved for 12 h and pretreated with or without 1 mM InsP<sub>6</sub> or 25  $\mu$ M LY294002 for 2 h, followed by 100 ng/ml TNF or 100 ng/ml insulin for 5 min. (A) Cell extracts were immunoprecipitated by monoclonal anti-PI3K (p85 $\alpha$ ) (PharMingen, San Diego, CA), coupled to protein G–Sepharose (Amersham). The precipitates were analyzed by immunoblotting using monoclonal anti-phosphotyrosine (Upstate Biotech, NY). Each panel shows the typical results and the mean  $\pm$  SEM of five independent determinations. (B and C) PI3K and PtdIns(3,4,5)P<sub>3</sub> production assays were performed as described in the Materials and methods. The experiments were repeated three times.

was detected after treatment with higher concentrations of InsP<sub>6</sub> (Figure 6B).

To examine whether InsP<sub>6</sub> activates the apoptotic machinery, we studied the cleavage of caspase 9 (caspase recruiting domain), caspase 3 (downstream caspase), and poly (ADP ribose) polymerase (death substrate, abbreviated as PARP). Degradation and cleavage of caspase 9, 3 and PARP were detected slightly after treatment with 0.5 mM InsP<sub>6</sub> (Figure 7). Much more degradation and cleavage was seen after 6 h treatment with 1 mM InsP<sub>6</sub>. The degradation and cleavage were increased by treatment for 12 h.

#### InsP<sub>6</sub> internalization and dephosphorylation

To determine how extracellularly applied InsP<sub>6</sub> affects the events observed above, HeLa cells were cultured with 1 mM InsP<sub>6</sub> (containing 0.5  $\mu$ Ci [<sup>3</sup>H]InsP<sub>6</sub>) for 6 h. The extract prepared from perchloric acid treated cells was analyzed by applying it to a strong anion exchange column, followed by scintillation counting. As shown in Figure 8, [<sup>3</sup>H]InsP<sub>6</sub> was internalized and dephosphorylated into InsP<sub>3</sub>, InsP<sub>4</sub> and InsP<sub>5</sub>. However, pre-incubation with colchicine, a pinocytosis inhibitor, did not produce the dephosphorylated forms of InsP<sub>6</sub>

(Figure 8). [<sup>3</sup>H]InsP<sub>6</sub> was incubated for 6 h with culture medium prepared just in the same way as for the analysis of [<sup>3</sup>H]inositol phosphates, but with no addition of an isotope InsP<sub>6</sub>, followed by the analysis of [<sup>3</sup>H]inositol phosphates. There was little production of lower [<sup>3</sup>H]inositol phosphates in the presence or absence of colchicines, indicating that they were the products inside cells.

*Effect of histone to lower the effective concentration of InsP<sub>6</sub>*  
Ozaki *et al.* (25) successfully used histone for intracellular delivery of chemically synthesized analogs of phosphoinositides and inositol phosphates. Therefore, we investigated the effect of histone on InsP<sub>6</sub>-induced apoptosis, as assessed by nuclear staining with propidium iodide followed by a flow cytometry. As shown in Figure 9, InsP<sub>6</sub> at concentration of 100  $\mu$ M exhibited a partial induction of apoptosis, but the inclusion of histone enhanced the InsP<sub>6</sub> action to the similar extent as that observed at 1 mM (see also Figure 2B).

#### Discussion

There have been many efforts to induce apoptosis in cancer cells, by activating Fas (26), Apaf-1 (20), apoptosis-inducing

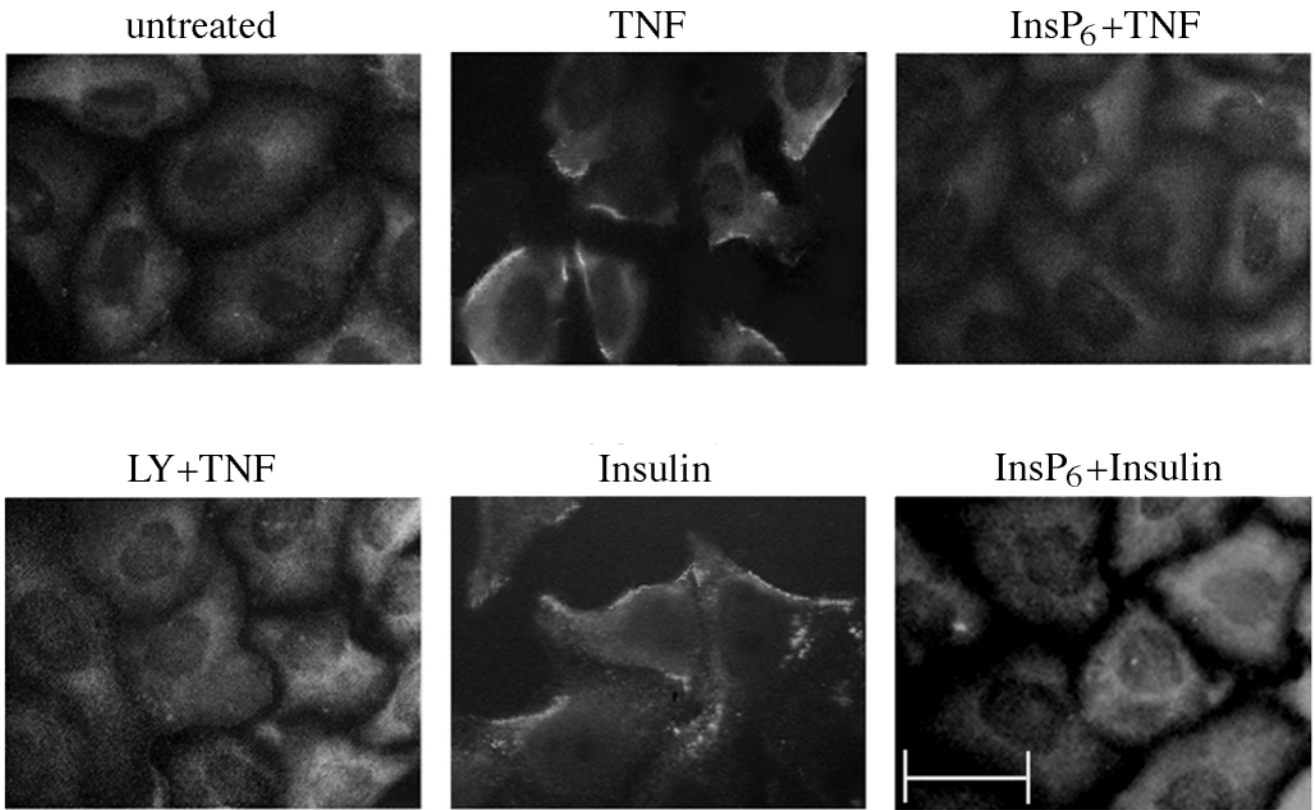

**Fig. 5.** Akt membrane translocation. HeLa cells ( $1 \times 10^6$ ) were seeded on coverslips, starved for 12 h and pretreated with or without 1 mM InsP<sub>6</sub> or 25  $\mu$ M LY294002 for 2 h, followed by 100 ng/ml TNF or 100 ng/ml insulin for 5 min. Immunofluorescence was carried out as described in the Materials and Methods. This experiment was repeated three times.

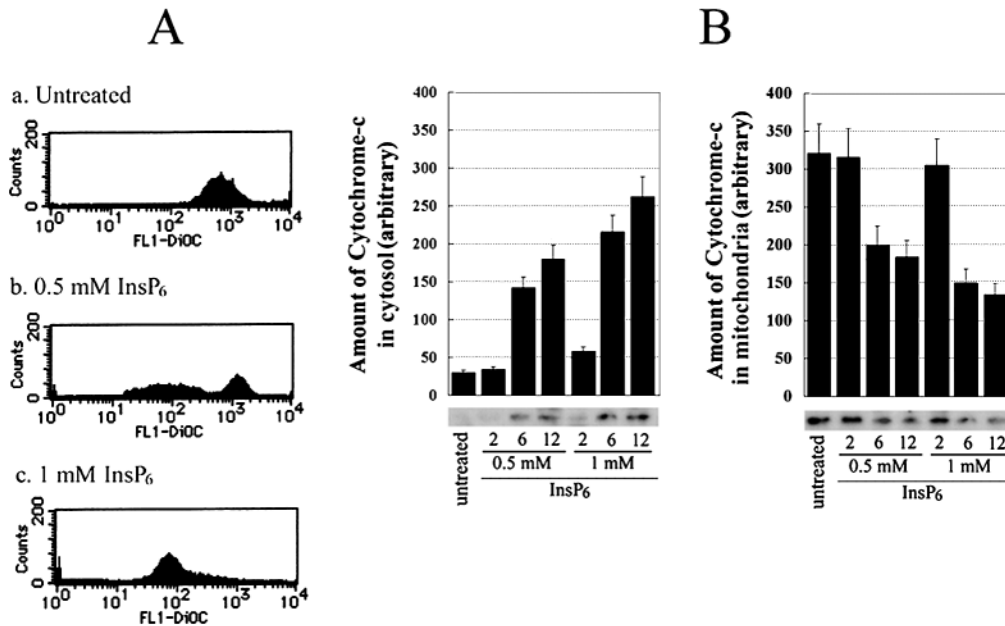

**Fig. 6.**  $\Delta\psi_m$  and cytochrome c release. (A) HeLa cells ( $1 \times 10^6$ ) were starved for 12 h and then stimulated with 0.5 or 1 mM InsP<sub>6</sub> for 6 h. Cells were analyzed for  $\Delta\psi_m$  as described in the Materials and methods. The experiment was repeated three times. (B) HeLa cells ( $5 \times 10^6$ ) were starved for 12 h and then stimulated with 0.5 or 1 mM InsP<sub>6</sub> for 2, 6 or 12 h. Cells were collected in PBS. Cytosol and mitochondrial fractions were obtained as described in the Materials and methods and analyzed by immunoblotting using monoclonal anti-cytochrome c (PharMingen). Each panel shows the typical results and the mean  $\pm$  SEM of five independent determinations.

factor (27), and inhibiting the survival pathway via mechanisms independent of (28), or dependent on (14,29), Akt activation. It has been reported that inositol phosphates, which are

recognized as second messengers inside cells, have the potential to inhibit cell growth, especially when InsP<sub>4</sub>, InsP<sub>5</sub> and InsP<sub>6</sub> are extracellularly applied (16).

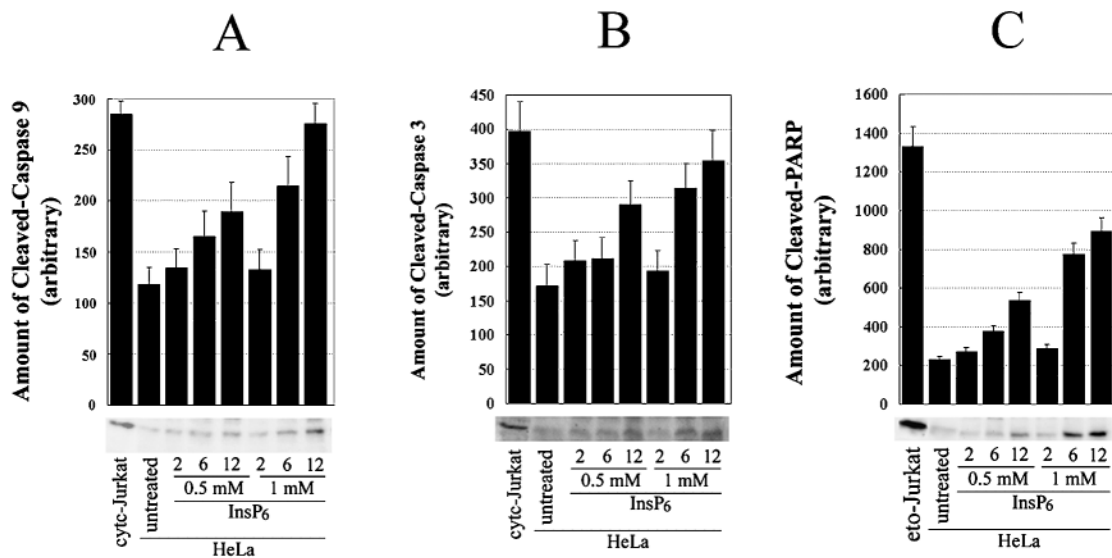

**Fig. 7.** Caspase 9, caspase 3 and PARP. HeLa cells ( $1 \times 10^6$ ) were starved for 12 h and then stimulated with 0.5 or 1 mM  $\text{InsP}_6$  for 2, 6 or 12 h. Cell extracts were analyzed by immunoblotting using polyclonal anti-cleaved-caspase-9 (Asp330) (New England BioLabs) (A), polyclonal anti-cleaved-caspase-3 (Asp175) (New England BioLabs) (B), polyclonal anti-cleaved-PARP (Asp214) (New England BioLabs) (C). Cyto-Jurkat and eto-Jurkat were included in the apoptosis sampler kit as positive controls. Each panel shows the typical results and the mean  $\pm$  SEM of five independent determinations.

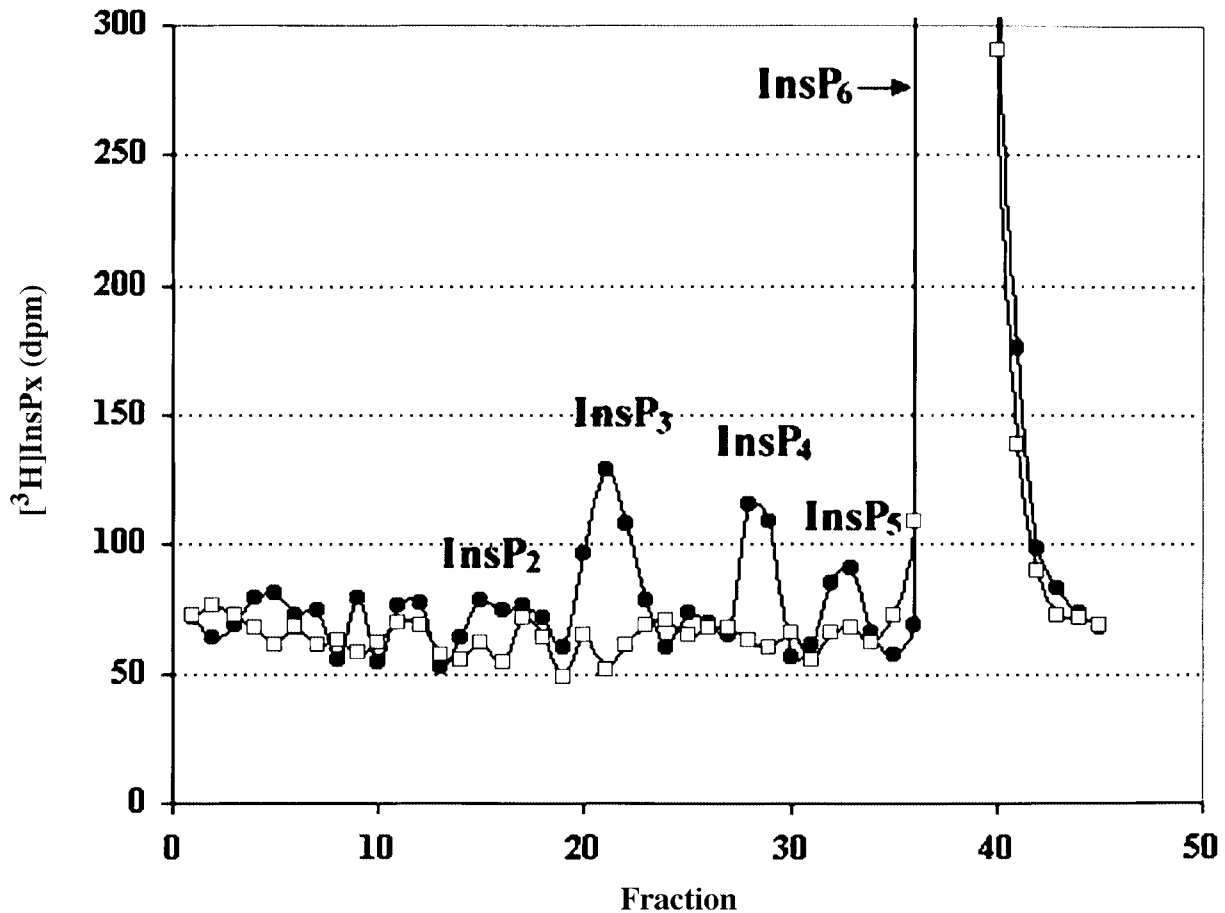

**Fig. 8.**  $\text{InsP}_6$  internalization and dephosphorylation. HeLa cells ( $1 \times 10^6$ ) were starved for 12 h and then incubated with or without 10  $\mu\text{g/ml}$  colchicine for 2 h. The cells were then stimulated with 1 mM  $\text{InsP}_6$  for 2 h, followed by the addition of 0.5  $\mu\text{Ci}$  of  $[^3\text{H}]\text{InsP}_6$  for 6 h. The procedures used were as described in the Materials and methods. The fractions of  $\text{InsP}_x$  indicated in the figure were examined by applying an authentic  $[^3\text{H}]\text{InsP}_x$  to the same column in advance. Most of the radioactivity corresponding to  $\text{InsP}_6$  appears to be originated from the extracellular space even after extensive washing. Open squares indicate the results obtained from the cells pretreated with colchicine. The figure represents a typical analysis and the experiment was repeated three times.



## A. Untreated

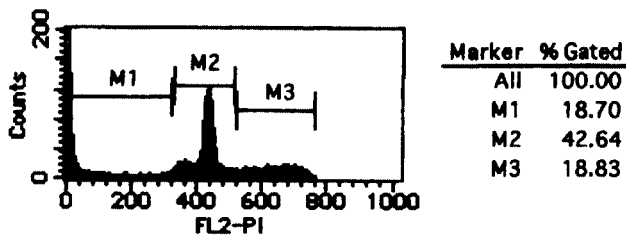B. 100  $\mu$ M InsP<sub>6</sub>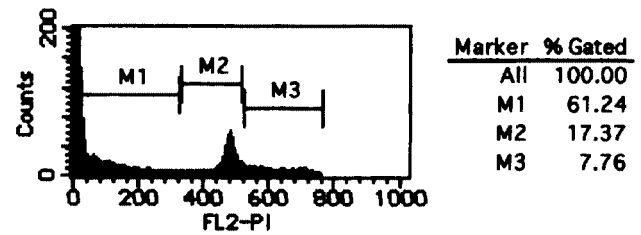C. 100  $\mu$ M InsP<sub>6</sub> + 50  $\mu$ M Histone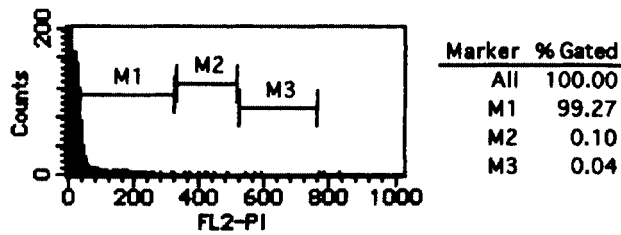

Fig. 9. Flow cytometry detection of apoptotic cells. HeLa cells ( $1 \times 10^6$ ) were starved for 12 h and then stimulated with none (A), 100  $\mu$ M InsP<sub>6</sub> (B) or 100  $\mu$ M InsP<sub>6</sub> plus 50  $\mu$ M histone (C) for 48 h. Histone alone exhibited the same pattern as that seen in (A). The procedures were described in the Materials and methods. This experiment was repeated five times.

The present results show that, besides having the potential to inhibit cell growth in both anchorage-dependent culture and anchorage-independent soft agar assays, InsPxs also have the potential to induce cell death. The ability of InsP<sub>6</sub> to cause cell death has already been described by another group (11) but the mechanisms underlying this are not clearly understood. It has been shown that the Akt pathway is a major pathway that can induce cell survival (13,21). Therefore, we first investigated the effect of InsP<sub>6</sub> on the Akt pathway.

Akt phosphorylated at Ser473 and Thr308, an active form, was upregulated by TNF stimulation, whilst pre-incubation with InsP<sub>6</sub> inhibited the phosphorylation. This effect of InsP<sub>6</sub> was also shown in an *in vitro* model assay using H2B as a substrate. Akt activated by phosphorylation has many downstream effects (30), one of which is the phosphorylation of I $\kappa$ B and consequent release of NF $\kappa$ B. Released NF $\kappa$ B is translocated to the nucleus, which is an important stage in the continuation of this survival pathway (31,32). We also noticed that pre-incubation with InsP<sub>6</sub> prior to TNF stimulation inhibited all of the activation signals mentioned above; the phosphorylation and degradation of I $\kappa$ B and NF $\kappa$ B translocation were abolished. We further pursued this investigation on NF $\kappa$ B-luciferase activity, and again we found that after pre-incubation with InsP<sub>6</sub>, the NF $\kappa$ B-luciferase activity was inhibited.

It was clear that InsP<sub>6</sub> could inhibit the Akt–NF $\kappa$ B pathway, but it was necessary to investigate the effect of InsP<sub>6</sub> on PI3K. This is a key regulator upstream of Akt (33), involved in a complex series of events, including genetic alterations, leading to aberrant cell cycle, progression and inhibition of apoptosis (34,35). In the present study, we found that InsP<sub>6</sub> did not inhibit the phosphorylation of p85, a regulatory subunit of type1 PI3K. We also found that InsP<sub>6</sub> did not decrease PI3K activity, as assessed by both an *in vitro* kinase assay using immunoprecipitates of anti-p85 antibody as an enzyme source

and PtdIns(3,4,5)P<sub>3</sub> production in intact cells labeled with [<sup>32</sup>P]orthophosphate. However, Akt membrane translocation, probably caused by the binding of the Akt PH domain to PtdIns(3,4,5)P<sub>3</sub> produced in the plasma membrane, was inhibited by pre-incubation with InsP<sub>6</sub>. Another group reported the inhibition of this process by Ins(1,4,5,6)P<sub>4</sub> (16), probably because of the binding of Ins(1,4,5,6)P<sub>4</sub> to Akt so that the PH domain of Akt cannot bind to PtdIns(3,4,5)P<sub>3</sub>. We reported previously the binding affinity between a variety of InsPxs and the PH domain of Akt (36,37), showing that the PH domain of Akt binds preferably to Ins(1,4,5,6)P<sub>4</sub>, interfering with the binding of Akt to PtdIns(3,4,5)P<sub>3</sub>.

Extracellularly applied InsP<sub>6</sub> is effective in the events observed in the present study, entering cells pinocytotically and then being further dephosphorylated into the appropriate InsPs. This was proved by analyzing [<sup>3</sup>H]inositol-labeled InsPxs in extracts of intact cells incubated with [<sup>3</sup>H]InsP<sub>6</sub>, [<sup>3</sup>H]InsP<sub>3</sub>, [<sup>3</sup>H]InsP<sub>4</sub> and [<sup>3</sup>H]InsP<sub>5</sub> metabolized from [<sup>3</sup>H]InsP<sub>6</sub> were found to be accumulated inside cells, but we have not yet analyzed which isomers are dominant. Morrison *et al.* (38) have suggested that InsP<sub>6</sub> kinase 2, which phosphorylates InsP<sub>6</sub> to InsP<sub>5</sub>-PP, might be important in apoptosis. We also found a small radioactive peak, corresponding to InsP<sub>5</sub>-PP (InsP<sub>7</sub>) in HeLa cells incubated with [<sup>3</sup>H]InsP<sub>6</sub> (data not shown), indicating that this inositol polyphosphate might also be involved in the apoptosis. These metabolites from [<sup>3</sup>H]InsP<sub>6</sub> would be produced inside cells, because the treatment with colchicine, an inhibitor of pinocytosis, did not produce the metabolites. Furthermore, little metabolites were produced by incubating [<sup>3</sup>H]InsP<sub>6</sub> with the culture medium prepared in the same way as for the assay of [<sup>3</sup>H]inositol phosphates. Since the radioactivities of [<sup>3</sup>H]InsP<sub>6</sub> were much the same between the cell extracts treated with or without colchicine, the majority of the radioactivity would be due to the extracellular binding.

In response to death stimuli, mitochondrial membranes are

permeabilized (39,40) and cytochrome c is released from the mitochondria (41,42). To find out whether InsP<sub>6</sub> is a death stimulator, we investigated the effect of InsP<sub>6</sub> on  $\Delta\psi_m$  without any stimulants, because the presence of stimulants, including serum, always enhances cell survival signals. The results showed that InsP<sub>6</sub> itself could cause a decrease in  $\Delta\psi_m$ , indicating that the mitochondria were permeabilized. Although there are reports that Akt is involved in maintaining the integrity of the mitochondrial membrane (43,44), in the present experimental system InsP<sub>6</sub> was applied without any stimulation, so that the Akt pathway was not upregulated. The results suggest that InsP<sub>6</sub> itself could directly cause the mitochondrial defect. We realize that inhibition of the Akt pathway by InsP<sub>6</sub> might play a role in affecting the mitochondria membrane potential as well. We also found increased amounts of cytochrome c in the cytosol and reduced cytochrome c levels in the mitochondria, indicating that cytochrome c was released from the mitochondria. Released cytochrome c induces the cleavage of caspase 9, a caspase recruiting domain, which induces the activation of caspase 3, and consequently the activation of apoptotic substrates (45). Our present results showed that, after treatment with InsP<sub>6</sub>, caspase 9, caspase 3 and PARP, an apoptotic substrate, were cleaved in a time- and InsP<sub>6</sub> concentration-dependent manner. Treatment of HeLa cells with 1 mM InsP<sub>6</sub> for 6 h, which was sufficient to cause mitochondrial permeabilization, cytochrome c release, activation of caspase 9, caspase 3 and PARP, was carried out to observe DNA fragmentation by TUNEL.

As mentioned in the introduction, the dephosphorylation of InsP<sub>6</sub> to InsP<sub>1-5</sub> can possibly enhance its anticancer function (16). We tested the potential of the lower forms to induce apoptosis. We treated HeLa cells with Ins(1,4,5,6)P<sub>4</sub> or Ins(1,3,4,5,6)P<sub>5</sub>, and detected apoptosis by flow cytometry. We found that these lower metabolites are more active than InsP<sub>6</sub>. This result agreed with the report by Razzini *et al.* (16). It suggested that InsP<sub>6</sub> enters the cell and is dephosphorylated to lower forms, which are more potent at inducing apoptosis. The lower phosphorylated forms, especially Ins(1,4,5,6)P<sub>4</sub>, which has the highest affinity for the Akt PH domain (36,37), also inhibit the Akt pathway (16), indicating that lower concentration of these agents could be used for anticancer action. However, InsP<sub>4</sub>, especially an isomer whose position of the phosphates is defined is expensive. So the trial to reduce the effective concentration of InsP<sub>6</sub> was achieved by using histone, the principle to use it is to neutralize the negative charges of the phosphates of InsP<sub>6</sub> to facilitate the transport through the plasma membrane (25).

In conclusion, we suggest that InsP<sub>6</sub>, which is probably pinocytotically transported into cells and subsequently dephosphorylated to InsP<sub>4</sub> and InsP<sub>5</sub>, can inhibit the Akt-NF $\kappa$ B cell survival pathway by inhibiting the translocation of Akt to the plasma membrane and, thus, its activation. It can also induce the apoptotic machinery directly. The next step is to clarify the mechanism by which extracellularly applied InsP<sub>6</sub> induces mitochondrial permeabilization.

### Acknowledgements

We would like to thank Drs S.Shears and K.Hidaka (NIEHS, USA) for help with the analysis of inositol phosphates. This work was supported by the Japan Society for Promotion of Science (JSPS) (to M.H.) and a Grant-in-Aid for Scientific Research from the Ministry of Education, Science, Sports, Culture and Technology of Japan (to M.H.), by the Kyushu University Interdisciplinary Programs in Education and Projects in Research Development (to M.H.).

### References

- Shamsuddin,A.M. (1999) Metabolism and cellular functions of IP<sub>6</sub>: a review. *Anticancer Res.*, **19**, 3733–3736.
- Szwergold,B.S., Graham,R.A. and Brown,T.R. (1987) Observation of inositol pentakis- and hexakis-phosphates in mammalian tissues by <sup>31</sup>P NMR. *Biochem. Biophys. Res. Commun.*, **149**, 874–881.
- Shamsuddin,A.M., Baten,A. and Lalwani,N.D. (1992) Effects of inositol hexaphosphate on growth and differentiation in K-562 erythroleukemia cell line. *Cancer Lett.*, **64**, 195–202.
- Sakamoto,K., Venkatraman,G. and Shamsuddin,A.M. (1993) Growth inhibition and differentiation of HT-29 cells *in vitro* by inositol hexaphosphate (phytic acid). *Carcinogenesis*, **14**, 1815–1819.
- Hirose,M., Ozaki,K., Takaba,K., Fukushima,S., Shirai,T. and Ito,N. (1991) Modifying effects of the naturally occurring antioxidants gamma-oryzanol, phytic acid, tannic acid and *n*-tritiacontane-16, 18-dione in a rat wide-spectrum organ carcinogenesis model. *Carcinogenesis*, **12**, 1917–1921.
- Estensen,R.D. and Wattenberg,L.W. (1993) Studies of chemopreventive effects of *myo*-inositol on benzo[*a*]pyrene-induced neoplasia of the lung and forestomach of female *A/J* mice. *Carcinogenesis*, **14**, 1975–1977.
- Thompson,L.U. and Zhang,L. (1991) Phytic acid and minerals: effect on early markers of risk for mammary and colon carcinogenesis. *Carcinogenesis*, **12**, 2041–2045.
- Shamsuddin,A.M. and Yang,G.Y. (1995) Inositol hexaphosphate inhibits growth and induces differentiation of PC-3 human prostate cancer cells. *Carcinogenesis*, **16**, 1975–1979.
- Sugano,H. (1999) The cancer problem—carcinogenesis and prevention from the viewpoint of the natural history of cancer. *Anticancer Res.*, **19**, 3787–3790.
- Jenab,M. and Thompson,L.U. (2000) Phytic acid in wheat bran affects colon morphology, cell differentiation and apoptosis. *Carcinogenesis*, **21**, 1547–1552.
- Zi,X., Singh,R.P. and Agarwal,R. (2000) Impairment of erbB1 receptor and fluid-phase endocytosis and associated mitogenic signaling by inositol hexaphosphate in human prostate carcinoma DU145 cells. *Carcinogenesis*, **21**, 2225–2235.
- Chen,N., Ma,W.Y. and Dong,Z. (2001) Inositol hexaphosphate inhibits ultraviolet B-induced signal transduction. *Mol. Carcinogen.*, **31**, 139–144.
- Ozes,O.N., Mayo,L.D., Gustin,J.A., Pfeffer,S.R., Pfeffer,L.M. and Donner,D.B. (1999) NF- $\kappa$ B activation by tumor necrosis factor requires the Akt serine-threonine kinase. *Nature*, **401**, 82–85.
- Sandra,F., Matsuki,N., Takeuchi,H., Ikebe,T., Kanematsu,T., Ohishi,M. and Hirata,M. (2002) TNF inhibited the apoptosis by activation of Akt serine/threonine kinase in the human head and neck squamous cell carcinoma. *Cell. Signal.* In press.
- Shamsuddin,A.M., Vucenik,I. and Cole,K.E. (1997) IP<sub>6</sub>: a novel anticancer agent. *Life Sci.*, **61**, 343–354.
- Razzini,G., Berrie,C.P., Vignati,S., Broggini,M., Mascetta,G., Brancaccio,A. and Falasca,M. (2000) Novel functional PI3-kinase antagonists inhibit cell growth and tumorigenicity in human cancer cell lines. *FASEB J.*, **14**, 1179–1187.
- Negri,C., Donzelli,M., Bernardi,R., Rossi,L., Burkle,A. and Scovassi,A.I. (1997) Multiparametric staining to identify apoptotic human cells. *Exp. Cell Res.*, **234**, 174–177.
- Yoshida,H., Sumichika,H., Hamano,S., He,X., Minamishima,Y., Kimura,G. and Nomoto K. (1995) Induction of apoptosis of T cells by infecting mice with murine cytomegalovirus. *J. Virol.*, **69**, 4769–4775.
- Hidaka,K., Kanematsu,T., Takeuchi,H., Nakata,M., Kikkawa,U. and Hirata,M. (2001) Involvement of the phosphoinositide 3-kinase/protein kinase B signaling pathway in insulin/IGF-I-induced chondrogenesis of the mouse embryonal carcinoma-derived cell line ATDC5. *Int. J. Biochem. Cell Biol.*, **33**, 1094–1103.
- Yoshida,H., Kong,Y.Y., Yoshida,R., Elia A.J., Hakem,A., Hakem, R., Penninger,J.M. and Mak,T.W. (1998) Apaf1 is required for mitochondrial pathways of apoptosis and brain development. *Cell*, **94**, 739–750.
- Sizemore,N., Lerner,N., Dombrowski,N., Sakuria,H. and Stark,G.R. (2001) Distinct roles of the I $\kappa$ B kinase  $\alpha$  and  $\beta$  subunits in liberating nuclear factor  $\kappa$ B (NF- $\kappa$ B) from I $\kappa$ B and in phosphorylating the p65 subunit of NF- $\kappa$ B. *J. Biol. Chem.*, **277**, 3863–3869.
- Khwaja,A. (1999) Akt is more than just a Bad kinase. *Nature*, **401**, 33–34.
- Remacle-Bonnet,M.M., Garrouste,F.L., Helle,S., Andre,F., Marvaldi,J.L. and Pommier,G.J. (2000) Insulin-like growth factor-I protects colon cancer cells from death factor-induced apoptosis by potentiating tumor necrosis factor  $\alpha$ -induced mitogen-activated protein kinase and nuclear factor  $\kappa$ B signaling pathways. *Cancer Res.*, **60**, 2007–2017.
- Tran,S.E.F., Holmstrom,T.H., Ahonen,M., Kahari,V.M. and Eriksson,J.E.

- (2001) MAPK/ERK overrides the apoptotic signaling from Fas, TNF and TRAIL receptors. *J. Biol. Chem.*, **276**, 16484–16490.
24. Ozaki,S., DeWald,D.B., Shope,J.C., Chen,J. and Prestwich,G.D. (2000) Intracellular delivery of phosphoinositides and inositol phosphates using polyamine carriers. *Proc. Natl Acad. Sci. USA*, **97**, 11286–1192.
  26. Nagata,S. (1997) Apoptosis by death factor. *Cell*, **88**, 355–365.
  27. Josa,N., Susin,S.A., Daugas,E. *et al.* (2001) Essential role of the mitochondrial apoptosis-inducing factor in programmed cell death. *Nature*, **410**, 549–554.
  28. Li,J., Yang,S. and Billiar,T.R. (2000) Cyclic nucleotides suppress tumor necrosis factor  $\alpha$ -mediated apoptosis by inhibiting caspase activation and cytochrome c release in primary hepatocytes via a mechanism independent of Akt activation. *J. Biol. Chem.*, **275**, 13026–13034.
  29. Kim,S., Jee,K., Kim,D., Koh,H. and Chung,J. (2001) Cyclic AMP inhibits Akt activity by blocking the membrane localization of PDK1. *J. Biol. Chem.*, **276**, 12864–12870.
  30. Downward,J. (1998) Mechanisms and consequences of activation of protein kinase B/Akt. *Curr. Opin. Cell Biol.*, **10**, 262–267.
  31. Wang,C.Y., Mayo,M.W. and Baldwin,A.S. Jr (1996) TNF- and cancer therapy-induced apoptosis: potentiation by inhibition of NF- $\kappa$ B. *Science*, **274**, 784–787.
  32. Van Antwerp,D.J., Martin,S.J., Kafri,T., Green,D.R. and Verma,I.M. (1996) Suppression of TNF- $\alpha$ -induced apoptosis by NF- $\kappa$ B. *Science*, **274**, 787–789.
  33. Bos,J.L. (1995) A target for phosphoinositide 3-kinase: Akt/PKB. *Trends Biochem. Sci.*, **20**, 441–442.
  34. Roymans,D. and Slegers,H. (2001) Phosphatidylinositol 3-kinases in tumor progression. *Eur. J. Biochem.*, **268**, 487–498.
  35. Krasilnikov,M.A. (2000) Phosphatidylinositol-3 kinase dependent pathways: the role in control of cell growth, survival and malignant transformation. *Biochemistry (Moscow)*, **65**, 59–67.
  36. Takeuchi,H., Kanematsu,T., Misumi,Y., Sakane,F., Konishi,H., Kikkawa,U., Watanabe,Y., Katan,M. and Hirata,M. (1997) Distinct specificity in the binding of inositol phosphates by pleckstrin homology domains of pleckstrin, RAC-protein kinase, diacylglycerol kinase and a new 130 kDa protein. *Biochim. Biophys. Acta*, **1359**, 275–285.
  37. Hirata,M., Kanematsu,T., Takeuchi,H. and Yagisawa,H. (1998) Pleckstrin homology domain as an inositol compound binding module. *Jpn. J. Pharmacol.*, **76**, 255–263.
  38. Morrison,B.H., Bauer,J.A., Kalvakolanu,D.V. and Lindner,D.J. (2001) Inositol hexakisphosphate kinase 2 mediates growth suppressive and apoptotic effects of interferon- $\beta$  in ovarian carcinoma cells. *J. Biol. Chem.* **276**, 24965–24970.
  39. Newmeyer,D.D., Farschon,D.M. and Reed,J.C. (1994) Cell-free apoptosis in *Xenopus* egg extracts: inhibition by Bcl-2 and requirement for an organelle fraction enriched in mitochondria. *Cell*, **79**, 353–364.
  40. Kroemer,G. and Reed,J.C. (2000) Mitochondrial control of cell death. *Nature Med.*, **6**, 513–519.
  41. Green,D.R. and Reed,J.C. (1998) Mitochondria and apoptosis. *Science*, **281**, 1309–1312.
  42. Kluck,R.M., Bossy-Wetzell,E., Green,D.R. and Newmeyer,D.D. (1997) The release of cytochrome c from mitochondria: a primary site for Bcl-2 regulation of apoptosis. *Science*, **275**, 1132–1136.
  43. Kennedy,S.G., Kandel,E.S., Cross,T.K. and Hay,N. (1999) Akt/Protein kinase B inhibits cell death by preventing the release of cytochrome c from mitochondria. *Mol. Cell Biol.*, **19**, 5800–5810.
  44. Tafani,M., Minchenko,D.A., Serroni,A. and Farber,J.L. (2001) Induction of the mitochondrial permeability transition mediates the killing of HeLa cells by staurosporine. *Cancer Res.*, **61**, 2459–2466.
  45. Hengartner,M.O. (2000) The biochemistry of apoptosis. *Nature*, **407**, 770–776.

Received June 14, 2002; revised August 20, 2002; accepted August 30, 2002
